# Supplementary material for: In situ synthesis of cobalt-embedded gadolinia-doped ceria nanocatalysts for high-temperature solid oxide cells
Source: Royal Society of Chemistry journal article supplement (doi:10.1039/d4ta03979c), 2024-01-01
Supplement: d4ta03979c1.pdf [file d4ta03979c1.pdf]

**Electronic Supplementary Information**

*In Situ Synthesis of Cobalt-Embedded Gadolinia-Doped Ceria  
Nanocatalysts for High-Temperature Solid Oxide Cells*

Hagyeong Cho<sup>1,2†</sup>, Haewon Seo<sup>1†</sup>, Jihong Min<sup>1,2</sup>, Ji-eun Won<sup>1,2</sup>, Jongsup Hong<sup>2\*</sup>, Kyung Joong Yoon<sup>1\*</sup>

1. Center for Energy Materials Research, Korea Institute of Science and Technology, 5, Hwarang-ro 14-gil, Seongbuk-gu, Seoul 02792, Republic of Korea
2. School of Mechanical Engineering, Yonsei University, 50, Yonsei-ro, Seodaemun-gu, Seoul 03722, Republic of Korea

† These authors equally contributed to this work.

E-mail: [kjyoon@kist.re.kr](mailto:kjyoon@kist.re.kr), [jongsup.hong@yonsei.ac.kr](mailto:jongsup.hong@yonsei.ac.kr)

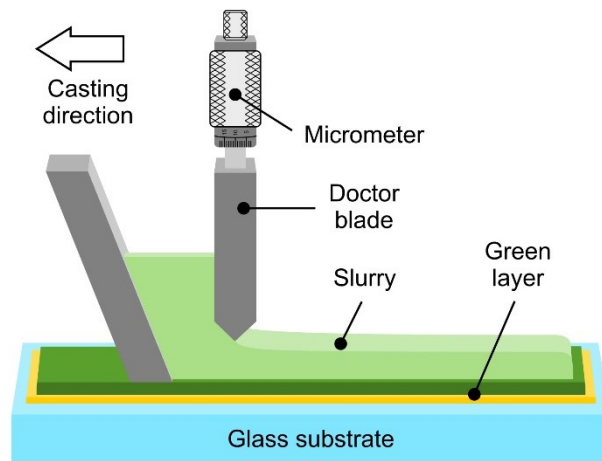

**Fig. S1** Schematic view of the sequential tape casting process.

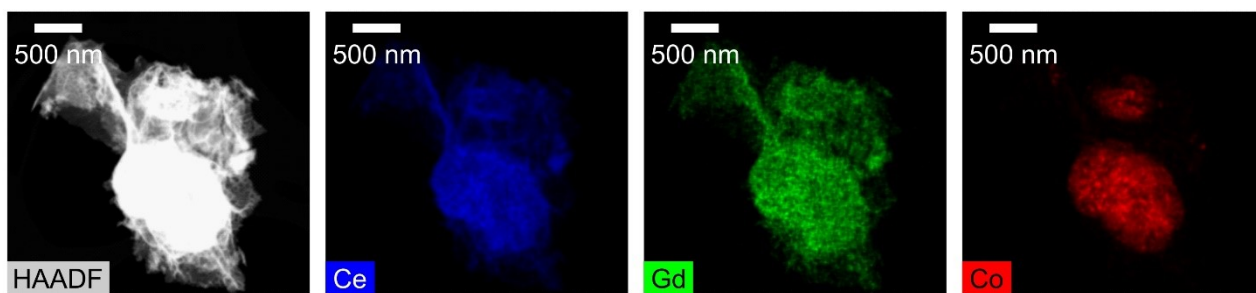

**Fig. S2** HAADF-STEM and TEM-EDS mapping images of 7 wt% cobalt-embedded GDC powder with large cobalt particles.

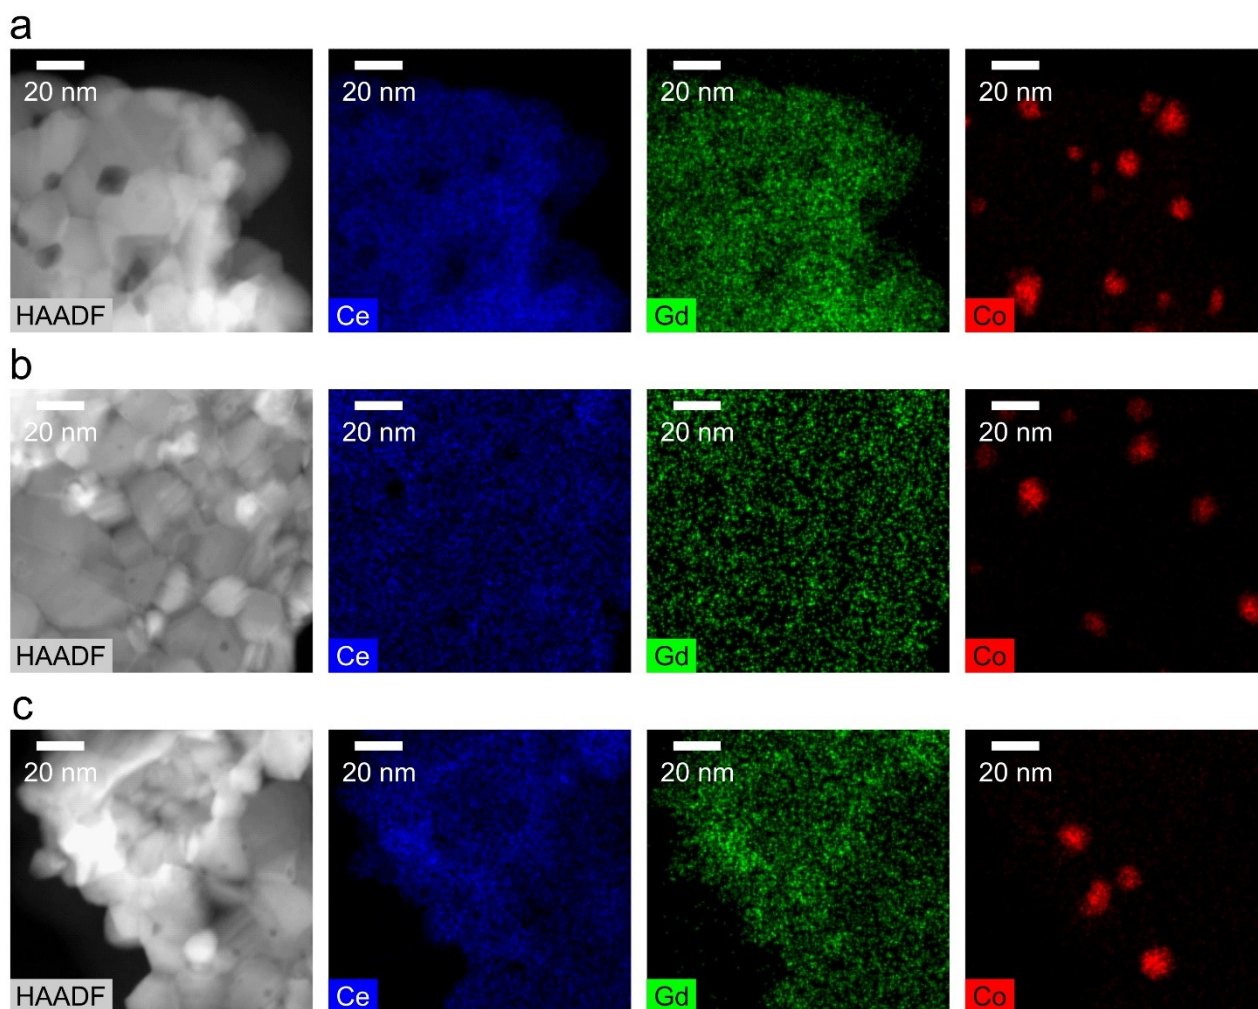

**Fig. S3** HAADF-STEM and TEM-EDS mapping images of GDC containing (a) 3 wt%, (b) 5 wt%, and (c) 7 wt% Co showing the chemical distributions of the constituent elements.

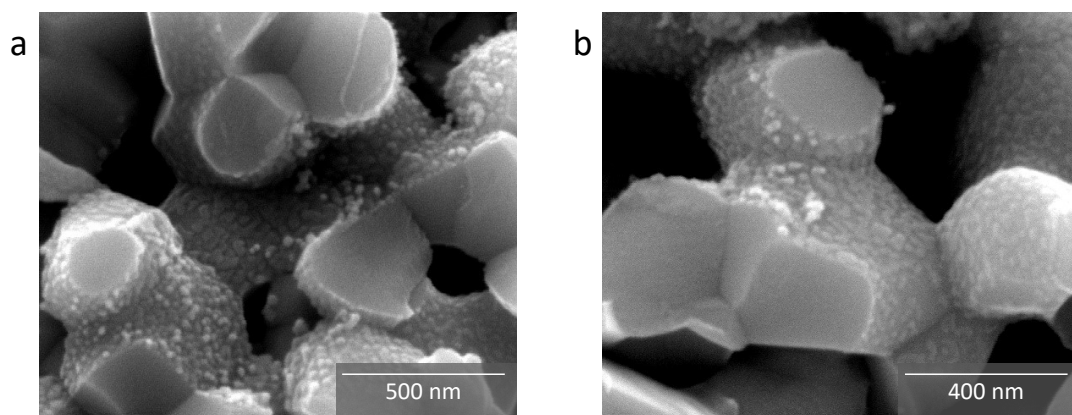

**Fig. S4.** SEM images of the nanoparticle-infiltrated fuel electrodes (a) before and (b) after reduction.

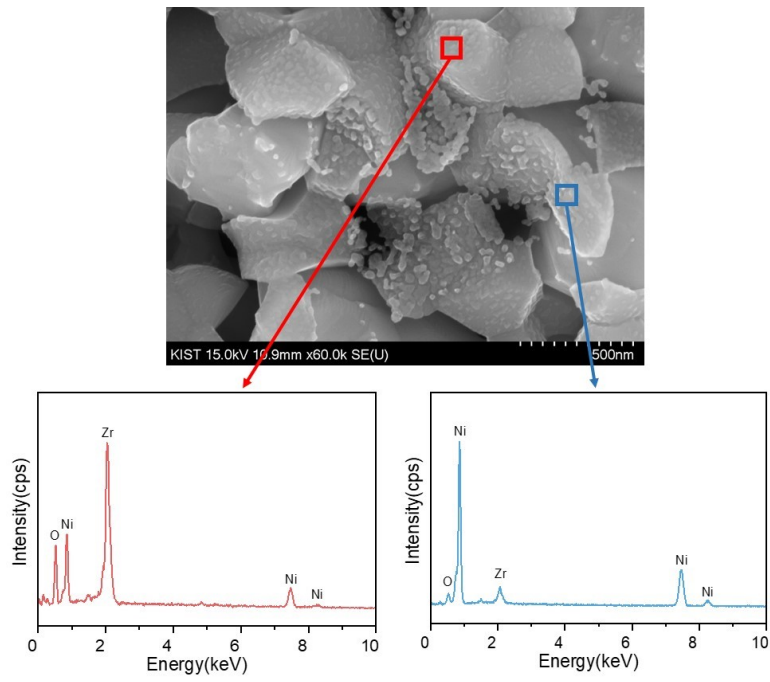

**Fig. S5.** (a) SEM image and EDS analysis showing nanoparticles formed on the surface of Ni (blue) and YSZ (red).

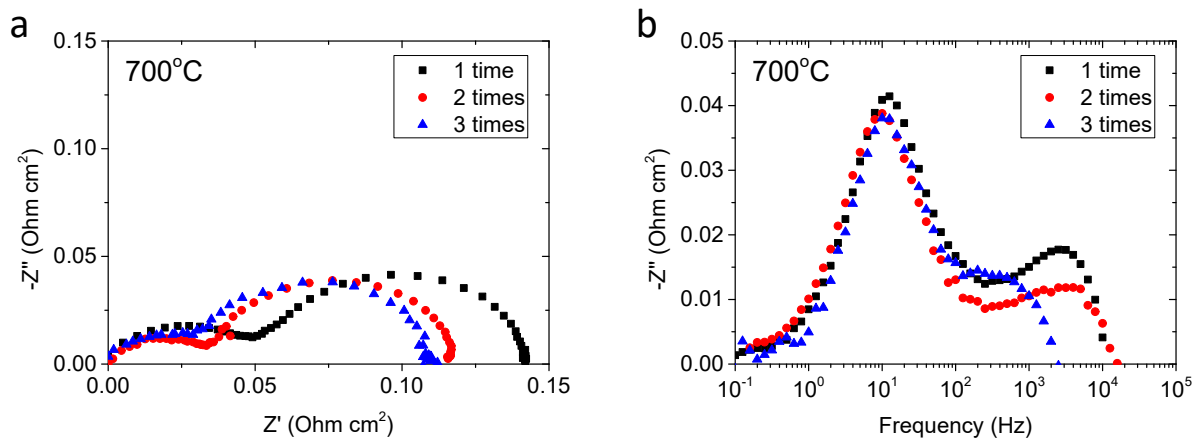

**Fig. S6.** Impedance spectra of the symmetric cells with varying numbers of infiltration cycles (1, 2, and 3 cycles), shown as (a) Nyquist and (b) Bode plots.

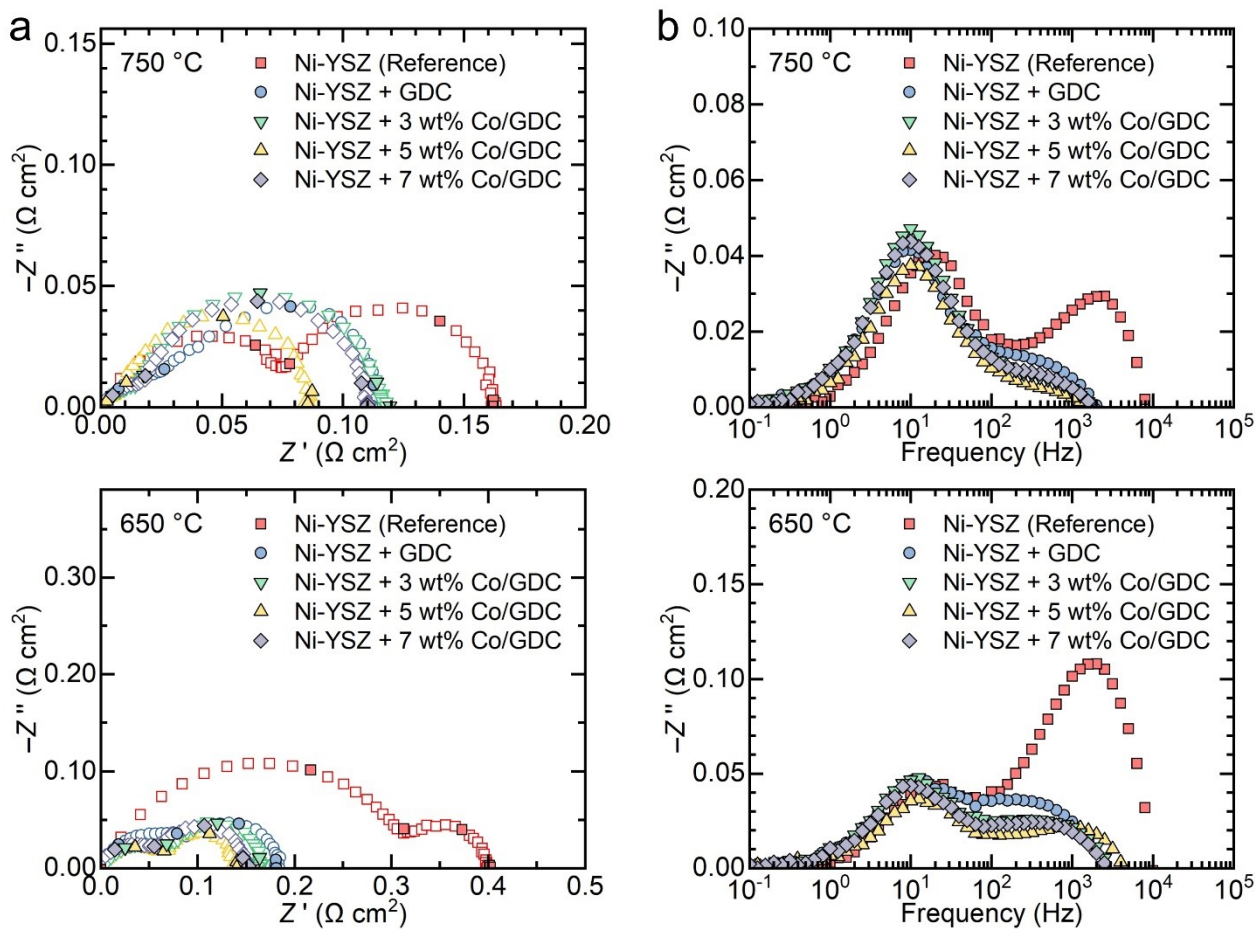

**Fig. S7.** (a) Nyquist and (b) Bode plots of impedance spectra of symmetric cells measured at 750 °C (above) and 650 °C (below).



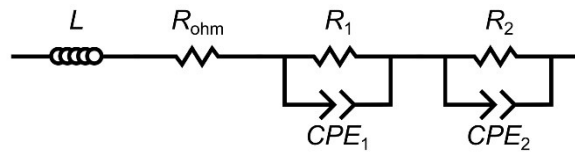

**Fig. S8.** Equivalent circuit model used for impedance fitting.

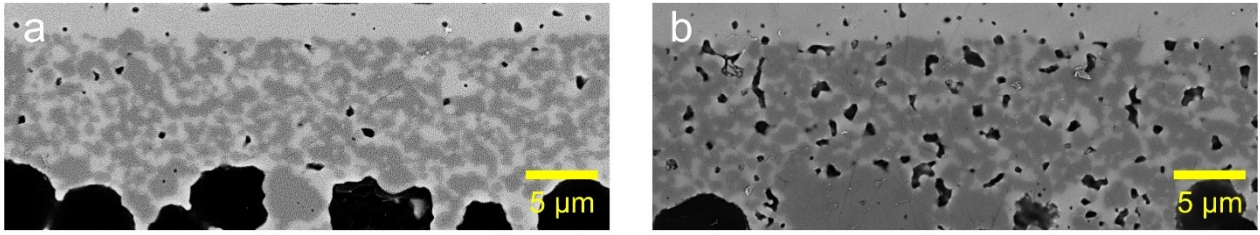

**Fig. S9.** Cross-sectional SEM images of (a) conventional and (b) microstructurally modified NiO-8YSZ fuel electrode functional layers in full cells.

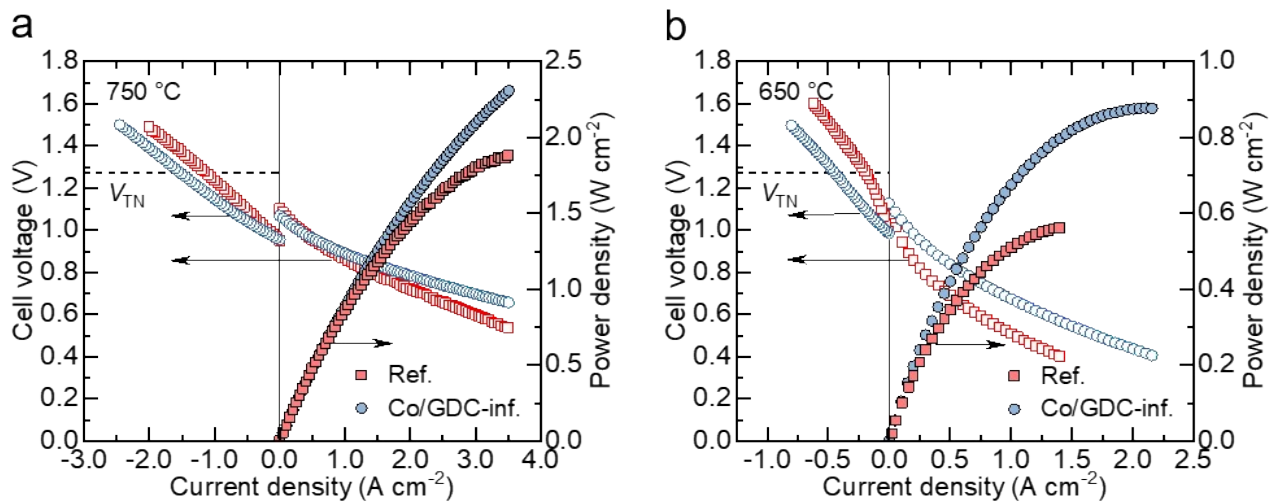

**Fig. S10.**  $i$ - $V$  characteristics of full cells with and without Co/GDC infiltration measured in fuel cell and electrolysis modes at (a)  $750^\circ\text{C}$  and (b)  $650^\circ\text{C}$ .

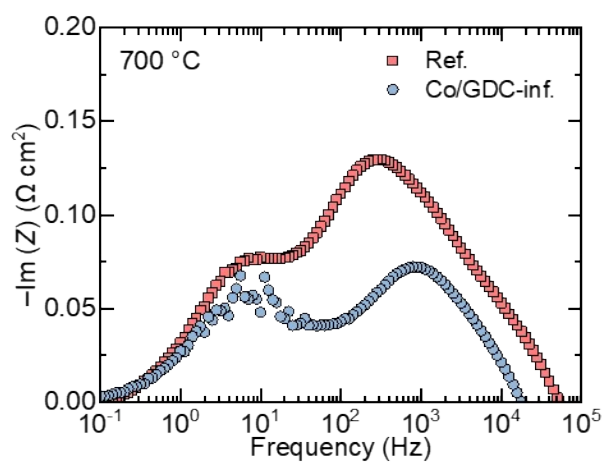

**Fig. S11.** Bode plot of impedance spectra of full cells with and without Co/GDC infiltration measured in fuel cell mode under OCV conditions at 700 °C.

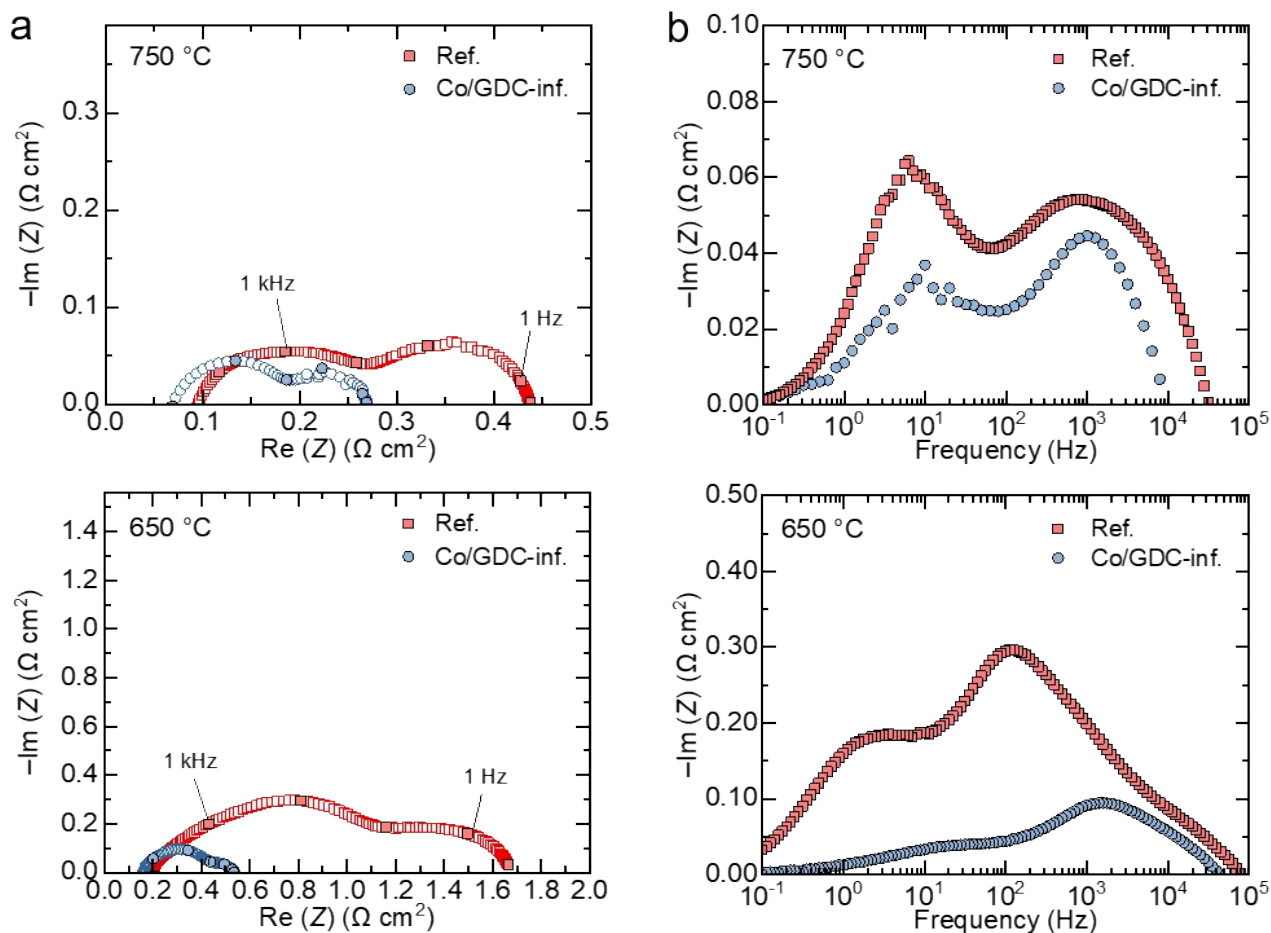

**Fig. S12.** (a) Nyquist and (b) Bode plots of impedance spectra of full cells with and without Co/GDC infiltration in fuel cell mode under OCV conditions at 750 °C (above) and 650 °C (below).

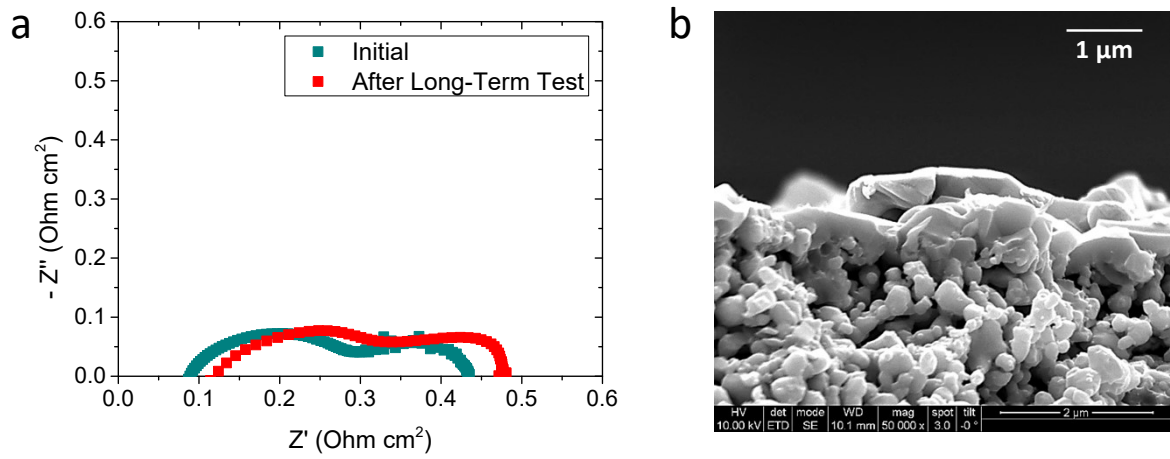

**Fig. S13.** (a) Impedance spectra of the cell before and after long-term operation, and (b) SEM image of top surface region of air electrode after long-term operation.

**Table S1.** Deconvoluted polarization resistances of symmetric cells in 3% H<sub>2</sub>O at various temperatures.

|                       | High-frequency resistance |        |        | Low-frequency resistance |        |        |
|-----------------------|---------------------------|--------|--------|--------------------------|--------|--------|
|                       | $(\Omega \text{ cm}^2)$   |        |        | $(\Omega \text{ cm}^2)$  |        |        |
|                       | 750 °C                    | 700 °C | 650 °C | 750 °C                   | 700 °C | 650 °C |
| Ni-YSZ (Reference)    | 0.418                     | 0.817  | 1.76   | 2.49                     | 2.56   | 2.54   |
| Ni-YSZ + GDC          | 0.244                     | 0.411  | 0.714  | 2.62                     | 2.62   | 2.61   |
| Ni-YSZ + 5 wt% Co/GDC | 0.201                     | 0.315  | 0.479  | 2.63                     | 2.64   | 2.63   |
